# Supplementary material for: The scavenger receptor repertoire in six cnidarian species and its putative role in cnidarian-dinoflagellate symbiosis
Source: PeerJ. 2016 Nov 15;4:e2692. doi: 10.7717/peerj.2692 (PMC5119243; doi:10.7717/peerj.2692)
Supplement: File S1 [file peerj-04-2692-s002.xlsx]

## Sheet: SR-A
Sequence	Organism	Original identifier/ Accession Number	Domain structure (Pfam)	Length of protein (aa)
A.digitifera SRA-like1	Acropora digitifera	aug_v2a.13777	SIG PEP-TM-CollagenX2-CUB-SRCR	555
A.digitifera SRA-like2	Acropora digitifera	aug_v2a.04186	SIG PEP-TM-Collagen-ISETX2-EGF_CAX2-CUB-SRCR	1690

## Sheet: SR-E
Sequence	Organism	Original identifier/ Accession Number	Domain structure (Pfam)	Length of protein (aa)
N.vectensis LOX1-like1	Nematostella vectensis	jgi|Nemve1|239025|estExt_fgenesh1_pg.C_110046	CTLD	115
N.vectensis LOX1-like2	Nematostella vectensis	jgi|Nemve1|210164|fgenesh1_pg.scaffold_117000056	CTLD	281
N.vectensis LOX1-like3	Nematostella vectensis	jgi|Nemve1|154303|e_gw.7191.2.1	CTLD	137
N.vectensis LOX1-like4	Nematostella vectensis	jgi|Nemve1|138199|e_gw.425.7.1	CTLD	92
N.vectensis LOX1-like5	Nematostella vectensis	jgi|Nemve1|118816|e_gw.156.96.1	CTLD	80
N.vectensis LOX1-like6	Nematostella vectensis	jgi|Nemve1|103399|e_gw.68.85.1	CTLD	129
N.vectensis LOX1-like7	Nematostella vectensis	jgi|Nemve1|102786|e_gw.66.179.1	CTLD	138
N.vectensis LOX1-like8	Nematostella vectensis	jgi|Nemve1|88150|e_gw.17.229.1	CTLD	125
N.vectensis LOX1-like9	Nematostella vectensis	jgi|Nemve1|87968|e_gw.17.235.1	CTLD	121
N.vectensis LOX1-like10	Nematostella vectensis	jgi|Nemve1|83478|e_gw.7.7.1	CTLD	121
N.vectensis LOX1-like11	Nematostella vectensis	jgi|Nemve1|83039|e_gw.7.243.1	CTLD	146
N.vectensis LOX1-like12	Nematostella vectensis	jgi|Nemve1|66344|gw.3.677.1	CTLD	99
A.elegantissima LOX1-like1	Anthopleura elegantissima	comp29206	TM-CTLD	177
A.elegantissima LOX1-like2	Anthopleura elegantissima	comp206797	SIG-TM-CTLD	241
A.elegantissima LOX1-like3	Anthopleura elegantissima	comp147141	SIG-TM-CTLD	115
A.elegantissima LOX1-like4	Anthopleura elegantissima	comp991	SIG-TM-CTLD	179
A.elegantissima LOX1-like5	Anthopleura elegantissima	comp165958	SIG-CTLD	267
A.elegantissima LOX1-like6	Anthopleura elegantissima	comp160005	CTLD	115
A.elegantissima LOX1-like7	Anthopleura elegantissima	comp16589	CTLD	140
A.elegantissima LOX1-like8	Anthopleura elegantissima	comp12131	CTLD	330
A.elegantissima LOX1-like9	Anthopleura elegantissima	comp8014	CTLD	252
Aiptasia LOX1-like1	Aiptasia pallida	AIPGENE25771	TM-CTLD-TM	378
Aiptasia LOX1-like2	Aiptasia pallida	AIPGENE25770	TM-CTLD-TM	509
Aiptasia LOX1-like3	Aiptasia pallida	AIPGENE25914	SIG-TMX2-CTLD-TM	524
Aiptasia LOX1-like4	Aiptasia pallida	AIPGENE25775	SIG-CTLD	404
Aiptasia LOX1-like5	Aiptasia pallida	AIPGENE24234	SIG-CTLD	748
Aiptasia LOX1-like6	Aiptasia pallida	AIPGENE22689	SIG-CTLD	197
Aiptasia LOX1-like7	Aiptasia pallida	AIPGENE17171	SIG-CTLD	175
Aiptasia LOX1-like8	Aiptasia pallida	AIPGENE17156	SIG-CTLD	193
Aiptasia LOX1-like9	Aiptasia pallida	AIPGENE17147	SIG-CTLD	120
Aiptasia LOX1-like10	Aiptasia pallida	AIPGENE4175	SIG-CTLD	302
Aiptasia LOX1-like11	Aiptasia pallida	AIPGENE2158	SIG-CTLD	385
Aiptasia LOX1-like12	Aiptasia pallida	AIPGENE26260	CTLD-TM	379
Aiptasia LOX1-like13	Aiptasia pallida	AIPGENE23661	CTLD-TM	589
Aiptasia LOX1-like14	Aiptasia pallida	AIPGENE8793	CTLD	143
Aiptasia LOX1-like15	Aiptasia pallida	AIPGENE25745	CTLD	300
Aiptasia LOX1-like16	Aiptasia pallida	AIPGENE22161	CTLD	127
Aiptasia LOX1-like17	Aiptasia pallida	AIPGENE20196	CTLD	132
Aiptasia LOX1-like18	Aiptasia pallida	AIPGENE18051	CTLD	188
Aiptasia LOX1-like19	Aiptasia pallida	AIPGENE18018	CTLD	224
Aiptasia LOX1-like20	Aiptasia pallida	AIPGENE18000	CTLD	241
Aiptasia LOX1-like21	Aiptasia pallida	AIPGENE17873	CTLD	214
Aiptasia LOX1-like22	Aiptasia pallida	AIPGENE17207	CTLD	297
Aiptasia LOX1-like23	Aiptasia pallida	AIPGENE17153	CTLD	173
Aiptasia LOX1-like24	Aiptasia pallida	AIPGENE16190	CTLD	131
Aiptasia LOX1-like25	Aiptasia pallida	AIPGENE15934	CTLD	112
Aiptasia LOX1-like26	Aiptasia pallida	AIPGENE13331	CTLD	250
Aiptasia LOX1-like27	Aiptasia pallida	AIPGENE11521	CTLD	668
Aiptasia LOX1-like28	Aiptasia pallida	AIPGENE10805	CTLD	137
Aiptasia LOX1-like29	Aiptasia pallida	AIPGENE9848	CTLD	209
Aiptasia LOX1-like30	Aiptasia pallida	AIPGENE8532	CTLD	206
Aiptasia LOX1-like31	Aiptasia pallida	AIPGENE2088	CTLD	364
Aiptasia LOX1-like32	Aiptasia pallida	AIPGENE6834	CTLD	243
A.digitifera LOX1-like1	Acropora digitifera	aug_v2a.15486	TM-CTLD-TM	564
A.digitifera LOX1-like2	Acropora digitifera	aug_v2a.03583	SIG-TM-CTLD	188
A.digitifera LOX1-like3	Acropora digitifera	aug_v2a.09977	SIG-CTLD	222
A.digitifera LOX1-like4	Acropora digitifera	aug_v2a.20063	CTLD-TM	446
A.digitifera LOX1-like5	Acropora digitifera	aug_v2a.12238	CTLD-TM	425
A.digitifera LOX1-like6	Acropora digitifera	aug_v2a.06178	CTLD-TM	633
A.digitifera LOX1-like7	Acropora digitifera	aug_v2a.23858	CTLD	140
A.digitifera LOX1-like8	Acropora digitifera	aug_v2a.12298	CTLD	329
A.digitifera LOX1-like9	Acropora digitifera	aug_v2a.10868	CTLD	121
A.digitifera LOX1-like10	Acropora digitifera	aug_v2a.07446	CTLD	130
A.digitifera LOX1-like11	Acropora digitifera	aug_v2a.06416	CTLD	180
A.millepora LOX1-like1	Acropora millepora	c030119	TM-CTLD	220
A.millepora LOX1-like2	Acropora millepora	c008721	SIG-TM-CTLD	639
A.millepora LOX1-like3	Acropora millepora	c026988	CTLD	129
A.millepora LOX1-like4	Acropora millepora	c024702	CTLD	156
A.millepora LOX1-like5	Acropora millepora	c022421	CTLD	197
F.scutaria LOX1-like1	Fungia scutaria	comp33746	SIG-TM-CTLD	578
F.scutaria LOX1-like2	Fungia scutaria	comp30359	SIG-CTLD	167
F.scutaria LOX1-like3	Fungia scutaria	comp22746	SIG-CTLD	633
F.scutaria LOX1-like4	Fungia scutaria	comp246601	CTLD	137
F.scutaria LOX1-like5	Fungia scutaria	comp111893	CTLD	169
F.scutaria LOX1-like6	Fungia scutaria	comp96085	CTLD	161
F.scutaria LOX1-like7	Fungia scutaria	comp42537	CTLD	72
F.scutaria LOX1-like8	Fungia scutaria	comp30359	CTLD	152
F.scutaria LOX1-like8	Fungia scutaria	comp11329	CTLD	174
F.scutaria LOX1-like10	Fungia scutaria	comp280	CTLD	355

## Sheet: SR-I
Sequence	Organism	Original identifier/ Accession Number	Domain structure (Pfam)	Length of protein (aa)
N.vectensis SRCR1	Nematostella vectensis	jgi|Nemve1|118215|e_gw.152.94.1	SRCRX2	242
N.vectensis SRCR2	Nematostella vectensis	jgi|Nemve1|130928|e gw.287.21.1	SRCRX3	327
N.vectensis SRCR3	Nematostella vectensis	jgi|Nemve1|212232|fgenesh1_pg.scaffold_152000003	SRCRX3	1282
N.vectensis SRCR4	Nematostella vectensis	jgi|Nemve1|217833|fgenesh1 pg.scaffold 314000022	SRCRX3	1003
N.vectensis SRCR5	Nematostella vectensis	jgi|Nemve1|224889|fgenesh1 pg.scaffold 6484000001	SRCRX3	328
N.vectensis SRCR6	Nematostella vectensis	jgi|Nemve1|230058|fgenesh1 pm.scaffold 134000005	SRCRX3	322
N.vectensis SRCR7	Nematostella vectensis	jgi|Nemve1|141947|e gw.622.10.1	SRCRX5	409
N.vectensis SRCR8	Nematostella vectensis	jgi|Nemve1|208577|fgenesh1 pg.scaffold 93000088	SRCRX6	681
N.vectensis SRCR9	Nematostella vectensis	jgi|Nemve1|133966|e gw.325.30.1	SRCRX9	951
A.elegantissima SRCR1	Anthopleura elegantissima	comp8605	SRCRX2	431
A.elegantissima SRCR2	Anthopleura elegantissima	comp29440	SRCRX2	222
A.elegantissima SRCR3	Anthopleura elegantissima	comp754	SRCRX11	1307
A.elegantissima SRCR4	Anthopleura elegantissima	comp11108	SRCRX5	801
A.elegantissima SRCR5	Anthopleura elegantissima	comp30702	SRCRX3	324
A.elegantissima SRCR6	Anthopleura elegantissima	comp43117	SRCRX3	477
A.elegantissima SRCR7	Anthopleura elegantissima	comp885	SRCRX3	315
Aiptasia SRCR1	Aiptasia pallida	AIPGENE2115	SRCR	662
Aiptasia SRCR2	Aiptasia pallida	AIPGENE5740	SRCR	142
Aiptasia SRCR3	Aiptasia pallida	AIPGENE13496	SRCR	180
Aiptasia SRCR4	Aiptasia pallida	AIPGENE14367	SRCR	162
Aiptasia SRCR5	Aiptasia pallida	AIPGENE17877	SRCR	463
Aiptasia SRCR6	Aiptasia pallida	AIPGENE19256	SRCR	166
Aiptasia SRCR7	Aiptasia pallida	AIPGENE20918	SRCR	117
Aiptasia SRCR8	Aiptasia pallida	AIPGENE10213	SRCRX2	230
Aiptasia SRCR9	Aiptasia pallida	AIPGENE14004	SRCRX2	276
Aiptasia SRCR10	Aiptasia pallida	AIPGENE15247	SRCRX2	260
Aiptasia SRCR11	Aiptasia pallida	AIPGENE28925	SRCRX2	578
Aiptasia SRCR12	Aiptasia pallida	AIPGENE5733	SRCRX2	530
Aiptasia SRCR13	Aiptasia pallida	AIPGENE7410	SRCRX2	261
Aiptasia SRCR14	Aiptasia pallida	AIPGENE15393	SRCRX2	264
Aiptasia SRCR15	Aiptasia pallida	AIPGENE19188	SRCRX2	268
Aiptasia SRCR16	Aiptasia pallida	AIPGENE19250	SRCRX2	236
Aiptasia SRCR17	Aiptasia pallida	AIPGENE19488	SRCRX2	509
Aiptasia SRCR18	Aiptasia pallida	AIPGENE28950	SRCRX2	264
Aiptasia SRCR19	Aiptasia pallida	AIPGENE18935	SRCRX3	807
Aiptasia SRCR20	Aiptasia pallida	AIPGENE10883	SRCRX3	544
Aiptasia SRCR21	Aiptasia pallida	AIPGENE18484	SRCRX3	828
Aiptasia SRCR22	Aiptasia pallida	AIPGENE28939	SRCRX3	567
Aiptasia SRCR23	Aiptasia pallida	AIPGENE20912	SRCRX4	475
Aiptasia SRCR24	Aiptasia pallida	AIPGENE28215	SRCRX4	383
Aiptasia SRCR25	Aiptasia pallida	AIPGENE7405	SRCRX6	998
Aiptasia SRCR26	Aiptasia pallida	AIPGENE13495	SRCRX6	956
Aiptasia SRCR27	Aiptasia pallida	AIPGENE13497	SRCRX8	1269
Aiptasia SRCR28	Aiptasia pallida	AIPGENE13500	SRCRX12	1778
Aiptasia SRCR29	Aiptasia pallida	AIPGENE4659	SRCRX23	3592
A.digitifera SRCR1	Acropora digitifera	aug_v2a.00627.t1	SRCR	160
A.digitifera SRCR2	Acropora digitifera	aug_v2a.06512.t1	SRCR	194
A.digitifera SRCR3	Acropora digitifera	aug_v2a.08252.t1	SRCR	112
A.digitifera SRCR4	Acropora digitifera	aug_v2a.12043.t1	SRCR	676
A.digitifera SRCR5	Acropora digitifera	adi_v1.05932	SRCRX2	266
A.digitifera SRCR6	Acropora digitifera	aug_v2a.21107.t1	SRCRX2	218
A.digitifera SRCR7	Acropora digitifera	aug_v2a.05932.t1	SRCRX2	266
A.digitifera SRCR8	Acropora digitifera	aug_v2a.24114.t1	SRCRX2	218
A.digitifera SRCR9	Acropora digitifera	adi_v1.02987	SRCRX4	806
A.digitifera SRCR10	Acropora digitifera	adi_v1.20497	SRCRX6	1014
A.digitifera SRCR11	Acropora digitifera	adi_v1.18340	SRCRX8	1265
A.millepora SRCR1	Acropora millepora	c001468	SRCRX10	1120
F.scutaria SRCR1	Fungia scutaria	comp217598	SRCRX2	232

## Sheet: SRCR+CUB
Sequence	Organism	Original identifier/ Accession Number	Domain structure (Pfam)	Length of protein (aa)
N.vectensis CUB	Nematostella vectensis	jgi|Nemve1|242231|estExt fgenesh1 pg.C 590046	MAM-SRCR-MAM-LDL-CUBX3	1310
A.elegantissima CUB	Anthopleura elegantissima	comp13519	SRCR-FN3-SRCR-FN3x2-CUB	1997
Aiptasia CUB1	Aiptasia pallida	AIPGENE22865	SRCR-FN3X2-SRCR-FN3X2-CUB-VWB-EGFX3	3718
Aiptasia CUB2	Aiptasia pallida	AIPGENE22864	SRCR-FN3-SRCR-FN3X2-CUB-VWD-EGFX3	4280
Aiptasia CUB3	Aiptasia pallida	AIPGENE2358	CUB-SRCRX2	345
A.digitifera CUB1	Acropora digitifera	aug_v2a.02958.t1	EGF-CUB-SRCRX2	375
A.digitifera CUB2	Acropora digitifera	aug_v2a.03894.t2	MAM-LDL-MAM-SRCR2-CUB-TM-UBOX	1126
A.digitifera CUB3	Acropora digitifera	aug_v2a.10056.t1	PAN1-EGF_CA-CUB-SRCR	453
A.digitifera CUB4	Acropora digitifera	aug_v2a.13776.t1	SIG PEP-EGF_CA-CUB-SRCR	506
A.digitifera CUB5	Acropora digitifera	aug_v2a.18885.t1	SRCR-FN3-CUB-EGF	3001
A.digitifera CUB6	Acropora digitifera	aug_v2a.19537.t1	EGF_CA-CUB-SRCRX2	382
A.digitifera CUB7	Acropora digitifera	aug_v2a.23712.t1	LECTIN C CUB SRCRX2	1087
A.digitifera CUB8	Acropora digitifera	aug_v2a.24394.t1	EGFX2- CUBX3-SRCR	376
A.digitifera CUB9	Acropora digitifera	aug_v2a.18043.t1	CUB-SRCRX2	305
A.millepora CUB1	Acropora millepora	c000424	SIG PEP-TM-MAM-SRCR-MAM- LDL-MAM-SRCRX3-WSC-CUBX2- UBOX	1948
A.millepora CUB2	Acropora millepora	c009570	EGF_CAX3- CUB-SRCRX2	558
F.scutaria CUB1	Fungia scutaria	comp2166	SRCRX2-WSC-CUB	341
F.scutaria CUB2	Fungia scutaria	comp2699	SRCR-FN3-CUB-FN3	767

## Sheet: SRCR+Trypsin
Sequence	Organism	Original identifier/ Accession Number	Domain structure (Pfam)	Length of protein (aa)
N.vectensis TRY1	Nematostella vectensis	jgi|Nemve1|199744|fgenesh1 pg.scaffold 17000033	SRCRX3- EGF-SRCRX6-TRYPSIN-TM	1823
A.elegantissima TRY1	Anthopleura elegantissima	comp713	TRYPSIN-SRCR	621
A.elegantissima TRY2	Anthopleura elegantissima	comp8236 c0 seq2 translation	SRCRX2-IGX6-TRYPSIN	1096
Aiptasia TRY1	Aiptasia pallida	AIPGENE6890	SRCRX3-TRYPSIN	530
Aiptasia TRY2	Aiptasia pallida	AIPGENE15640	SRCRX2-MAM-ISET-IG2-IG3-IG2X2-IG3-TRYPSIN	1337
A.digitifera TRY1	Acropora digitifera	aug_v2a.02016.t1	SRCRX2 -MAMX2-IG2X2-IG3X2-TRYPSIN	1216
A.millepora TRY1	Acropora millepora	c000899	SIG PEP-SRCRX4-MAM-IGX7-TRYPSIN	1647

## Sheet: SR-B
Phylum	Organism	Sequence identifier	Original identifier/ Accession Number	Domain structure (Pfam)	Length of protein (aa)
Ctenophora	Mnemiopsis leidyi	M. leidyi	ML01096a	CD36	489
Porifera	Oscarella carmela	O. carmela_1	comp37448	CD36	494
	Suberites domuncula	S. domuncula	gi|46981146	CD36	490
	Amphimedon queenslandica	A. queenslandica	gi|340380125	CD36	551
Placozoa	Tricoplax adherans	T. adherans	XP_002112871.1	CD36	507
Cnidaria	Nematostella vectensis	N.vectensis_1	jgi|Nemve1|12228|gw.216.12.1	CD36	379
	Nematostella vectensis	N.vectensis_2	jgi|Nemve1|93030|e_gw.32.86.1	CD36	397
	Nematostella vectensis	N.vectensis_3	jgi|Nemve1|115992|e_gw.135.24.1	CD36	394
	Anthopleura elegantissima	A.elegantissima	comp27898	TM-CD36-TM	408
	Anthopleura elegantissima	A.elegantissima_2	comp105988	CD36-TM	247
	Aiptasia pallida	A.pallida_1	AIPGENE27709, COMP18601	TM-CD36-TM	517
	Aiptasia pallida	A.pallida_2	AIPGENE13459, COMP 9241	TM-CD36-TM	518
	Aiptasia pallida	A.pallida_3	AIPGENE25617, COMP18959	CD36-TM	495
	Aiptasia pallida	A.pallida_4	AIPGENE9495, COMP18212	TM-CD36	561
	Acropora digitifera	A.digitifera_1	aug_v2a.07404	TM-CD36-TM	553
	Acropora digitifera	A.digitifera_2	aug_v2a.02372	CD36-TM	254
	Acropora digitifera	A.digitifera_3	aug_v2a.04988	CD36-TM	237
	Acropora digitifera	A.digitifera_4	aug_v2a.16675	CD36-TM	323
	Acropora millepora	A.millepora_1	c004851	CD36-TM	424
	Acropora millepora	A.millepora_2	c007468	CD36-TM	524
	Acropora millepora	A.millepora_3	c011462	CD36-TM	281
	Fungia scutaria	F.scutaria_1	comp23243	TM-CD36-TM	520
	Fungia scutaria	F.scutaria_2	comp8783	CD36-TM	472
	Fungia scutaria	F.scutaria_3	comp207143	TM-CD36	238
Nematoda	Caenorhabditis elegans	C. elegans	gi|25005153|emb|CAB11566.3	CD36	534
Arthropoda	Drosophila melanogaster	D. melanogaster_peste	NP_609168.1	CD36	589
	Drosophila melanogaster	D. melanogaster_croque	NP_787957.1	CD36	491
	Drosophila melanogaster	D. melanogaster_EMP	NP_523859.2	CD36	520
Echinodermata	Strongylocentrotus purpuratus	S. purpuratus_1	XP_003729136.1	CD36	540
	Strongylocentrotus purpuratus	S. purpuratus_2	XP_003723576.1	CD36	508
Chordata, Subphylum Urochordata	Ciona intestinalis	C. intestinalis_1	XP_009859599.1	TM-CD36-TM	523
	Ciona intestinalis	C. intestinalis_2	XP_002123211.2	TM-CD36-TM	528
Chordata, Subphylum Cephalochordata	Branchiostoma floridae	B. floridae	XP_002609178.1	TM-CD36-TM	480
Chordata, Subphylum Vertebrata	Xenopus laevis	X. laevis	NP_001080106.1	TM-CD36-TM	484
	Danio rerio	D. rerio_SRB1	AAH44516.1	TM-CD36-TM	457
	Danio rerio	D. rerio_CD36	AAH76048.1	TM-CD36-TM	465
	Danio rerio	D. rerio_LMP2	NP_775366.1	TM-CD36-TM	531
	Mus musculus	M. musculus_SRB1	Q61009	TM-CD36-TM	501
	Mus musculus	M. musculus_CD36	Q08857.2	TM-CD36-TM	472
	Mus musculus	M. musculus_LMP2	NP_031670	TM-CD36-TM	478
	Homo sapiens	H. sapiens_SRB1	Q8WTV0.1	TM-CD36-TM	552
	Homo sapiens	H. sapiens_CD36	NP_001001547	TM-CD36-TM	472
	Homo sapiens	H. sapiens_LMP2	NP_005497	TM-CD36-TM	478

## Sheet: blast query sequences
SR type	Organism	Sequence identifier	Original identifier/ Accession Number	Domain structure (Pfam)	Length of protein (aa)
SRA1	Mus musculus	M. musculus_SRA	NP_112472.2	MSR-CollagenX2	354
	Homo sapiens	H. sapiens_SRA	NP_619729	MSR-Collagen-SRCR	451
MARCO	Mus musculus	M. musculus_MARCO	NP_034896	CollagenX2-SRCR	518
	Homo sapiens	H. sapiens_MARCO	NP_006761	CollagenX2-SRCR	520
SRCL	Mus musculus	M. musculus_SRCL	NP_569716.2	CollagenX3-CTLD	742
	Homo sapiens	H. sapiens_SRCL	NP_569057.1	CollagenX3-CTLD	742
SRB	Mus musculus	M. musculus_SRB1	Q61009	TM-CD36-TM	501
	Mus musculus	M. musculus_CD36	Q08857.2	TM-CD36-TM	472
	Mus musculus	M. musculus_LMP2	NP_031670	TM-CD36-TM	478
	Homo sapiens	H. sapiens_SRB1	Q8WTV0.1	TM-CD36-TM	552
	Homo sapiens	H. sapiens_CD36	NP_001001547	TM-CD36-TM	472
	Homo sapiens	H. sapiens_LMP2	NP_005497	TM-CD36-TM	478
LOX1	Mus musculus	M. musculus_LOX1	NP_619589	CTLD	363
	Homo sapiens	H. sapiens_LOX1	gi|4468344|emb|CAB38175.1	CTLD	273
