# Supplementary material for: The scavenger receptor repertoire in six cnidarian species and its putative role in cnidarian-dinoflagellate symbiosis
Source: PeerJ. 2016 Nov 15;4:e2692. doi: 10.7717/peerj.2692 (PMC5119243; doi:10.7717/peerj.2692)
Supplement: File S2 — Experimental procedures are described within materials and methods. Excel file: column one lists the anemone treatments Filtered seawater (FSW), fucoidan concentrations within FSW, 100, 200, 400 mg/ml and focoidan treated washed control. Column 2 shows the two sample time points 48h and 96h. Column three shows the infection success described as mean fluorescence intensity (MFI) of chlorophyll auto fluorescence with excitation and emission wavelengths of 543 and 600–700 nm, respectively (see methods for full explanation). Column four labels the anemones for example anemone 1 = A1 and three tentacles from anemone 1 are labelled A1. [file peerj-04-2692-s003.csv]

Treatment	Time	infection	Anemone
Filtered seawater control	0	0
Filtered seawater control	48	4	A1
Filtered seawater control	48	1.9	A1
Filtered seawater control	48	8.9	A1
Filtered seawater control	48	2.3	A2
Filtered seawater control	48	4.9	A2
Filtered seawater control	48	2.8	A2
Filtered seawater control	48	3.4	A3
Filtered seawater control	48	2.8	A3
Filtered seawater control	48	1.6	A3
Filtered seawater control	96	8.4	A1
Filtered seawater control	96	12	A1
Filtered seawater control	96	11	A1
Filtered seawater control	96	7.3	A2
Filtered seawater control	96	6.4	A2
Filtered seawater control	96	13	A2
Filtered seawater control	96	4.8	A3
Filtered seawater control	96	4	A3
Filtered seawater control	96	6.6	A3
x100mg	0	0
x100mg	48	0.3	A4
x100mg	48	4.7	A4
x100mg	48	0.9	A4
x100mg	48	0.4	A5
x100mg	48	0	A5
x100mg	48	0.8	A5
x100mg	48	0.8	A6
x100mg	48	0.2	A6
x100mg	48	0	A6
x100mg	96	2.7	A4
x100mg	96	2.9	A4
x100mg	96	7	A4
x100mg	96	3.6	A5
x100mg	96	2.8	A5
x100mg	96	1.5	A5
x100mg	96	4.4	A6
x100mg	96	2	A6
x100mg	96	3.1	A6
y200mg	0	0
y200mg	48	0.2	A10
y200mg	48	2.8	A10
y200mg	48	0	A10
y200mg	48	0.1	A11
y200mg	48	0	A11
y200mg	48	0.6	A11
y200mg	48	0	A12
y200mg	48	0	A12
y200mg	48	0	A12
y200mg	96	2.1	A10
y200mg	96	4.1	A10
y200mg	96	2	A10
y200mg	96	0.5	A11
y200mg	96	0.8	A11
y200mg	96	0.9	A11
y200mg	96	1	A12
y200mg	96	0.6	A12
y200mg	96	1.35	A12
z400mg	0	0
z400mg	48	0	A16
z400mg	48	0.1	A16
z400mg	48	0	A16
z400mg	48	0.08	A17
z400mg	48	0.04	A17
z400mg	48	0.06	A17
z400mg	48	0.08	A18
z400mg	48	0.06	A18
z400mg	48	0.09	A18
z400mg	96	0.4	A16
z400mg	96	0.8	A16
z400mg	96	0.6	A16
z400mg	96	0.1	A17
z400mg	96	0.04	A17
z400mg	96	0.06	A17
z400mg	96	0.5	A18
z400mg	96	0.7	A18
z400mg	96	0.8	A18
fucwashed	0	0
fucwashed	48	2.4	A13
fucwashed	48	2.9	A13
fucwashed	48	2.6	A13
fucwashed	48	3.3	A14
fucwashed	48	3.3	A14
fucwashed	48	1.9	A14
fucwashed	48	3	A15
fucwashed	48	2.7	A15
fucwashed	48	3.9	A15
fucwashed	96	6	A13
fucwashed	96	9	A13
fucwashed	96	7	A13
fucwashed	96	8	A14
fucwashed	96	9.6	A14
fucwashed	96	10	A14
fucwashed	96	2.5	A15
fucwashed	96	3.5	A15
fucwashed	96	6	A15
Filtered seawater control	0	0	A1
x100mg	0	0	A4
y200mg	0	0	A10
z400mg	0	0	A16
fucwashed	0	0	A13
Filtered seawater control	0	0	A2
x100mg	0	0	A5
y200mg	0	0	A11
z400mg	0	0	A17
fucwashed	0	0	A14
Filtered seawater control	0	0	A3
x100mg	0	0	A6
y200mg	0	0	A12
z400mg	0	0	A18
fucwashed	0	0	A15
