# Supplementary material for: The scavenger receptor repertoire in six cnidarian species and its putative role in cnidarian-dinoflagellate symbiosis
Source: PeerJ. 2016 Nov 15;4:e2692. doi: 10.7717/peerj.2692 (PMC5119243; doi:10.7717/peerj.2692)
Supplement: File S3 — Experimental procedures are described within materials and methods. Excel file: column one lists the anemone treatments filtered seawater (0), fucoidan concentrations within filtered seawater, 100, 200, 400 and 800mg/ml. Column two labels the anemones 1–5 and column three labels the tentacles. Columns 4,5 and 6 label reads 1–3 these represent three mean fluorescence intensity (MFI) reads of chlorophyll auto fluorescence taken from three separate areas in the same anemone tentacle (see ‘methods’ for full explanation). [file peerj-04-2692-s004.csv]

Fucoidan	Anemone	Tentacle	read1	read2	read3
0	1	1	16.59	17.4	17.36
0	1	2	8.06	8.12	7.92
100	2	3	12.88	13.73	13.57
100	2	4	30.46	31.33	31.09
100	2	5	12.94	12.98	12.86
100	2	6	31.06	31.82	30.77
200	3	7	56.69	56.79	54.6
200	3	8	45	46	45.77
400	4	9	76	77	75
400	4	10	68	68	66
800	5	11	62	62	59
800	5	12	55	66	55
800	5	13	95	98	95
