# Supplementary material for: The scavenger receptor repertoire in six cnidarian species and its putative role in cnidarian-dinoflagellate symbiosis
Source: PubMed Central journal article supplement (PMC5119243; doi:10.7717/peerj.2692), 2016-11-15
Supplement: peerj-04-2692-s001.pdf [file peerj-04-2692-s001.pdf]

**Table S1.** Metazoan resources searched to identify sequences for this study.

| Phylum        | Organism                             | Resource                                                                                                                                  | Reference                                         |
|---------------|--------------------------------------|-------------------------------------------------------------------------------------------------------------------------------------------|---------------------------------------------------|
| Ctenophora    | <i>Mnemiopsis leidyi</i>             | <a href="http://research.nhgri.nih.gov/mnemiopsis/blast/">http://research.nhgri.nih.gov/mnemiopsis/blast/</a>                             | (Ryan et al. 2013)                                |
| Porifera      | <i>Oscarella carmella</i>            | <a href="http://www.compagen.org/index.html">http://www.compagen.org/index.html</a>                                                       | (Nichols et al. 2012)                             |
|               | <i>Suberites domuncula</i>           | NCBI: <a href="http://www.ncbi.nlm.nih.gov/">http://www.ncbi.nlm.nih.gov/</a>                                                             | (Harcet et al. 2010)                              |
|               | <i>Amphimedon queenslandica</i>      | <a href="http://metazoa.ensembl.org/Amphimedon_queenslandica">http://metazoa.ensembl.org/Amphimedon_queenslandica</a>                     | (Srivastava et al. 2010)                          |
| Placozoa      | <i>Trichoplax adhaerens</i>          | <a href="http://genome.jgi-psf.org/Triad1/Triad1.home.html">http://genome.jgi-psf.org/Triad1/Triad1.home.html</a>                         | (Srivastava et al. 2008)                          |
| Cnidaria      | <i>Nematostella vectensis</i>        | <a href="http://genome.jgi-psf.org/Nemve1/Nemve1.home.html">http://genome.jgi-psf.org/Nemve1/Nemve1.home.html</a>                         | (Putnam et al. 2007)                              |
|               | <i>Anthopleura elegantissima</i>     | <a href="http://people.oregonstate.edu/~meyere/data.html">http://people.oregonstate.edu/~meyere/data.html</a>                             | (Kitchen et al. 2015)                             |
|               | <i>Aiptasia pallida</i>              | <a href="http://pringlelab.stanford.edu/projects.html">http://pringlelab.stanford.edu/projects.html</a>                                   | (Lehnert et al. 2012)<br>(Baumgarten et al. 2015) |
|               | <i>Acropora digitifera</i>           | <a href="http://marinegenomics.oist.jp/genomes/gallery">http://marinegenomics.oist.jp/genomes/gallery</a>                                 | (Shinzato et al. 2011)                            |
|               | <i>Acropora millepora</i>            | <a href="http://www.bio.utexas.edu/research/matz_lab/matzlab/Data.html">http://www.bio.utexas.edu/research/matz_lab/matzlab/Data.html</a> | (Moya et al. 2012)                                |
|               | <i>Fungia scutaria</i>               | <a href="http://people.oregonstate.edu/~meyere/data.html">http://people.oregonstate.edu/~meyere/data.html</a>                             | (Kitchen et al. 2015)                             |
| Nemotoda      | <i>Caenorhabditis elegans</i>        | <a href="http://www.wormbase.org/">http://www.wormbase.org/</a>                                                                           | (Stein et al. 2001)                               |
| Arthropoda    | <i>Drosophila melanogaster</i>       | NCBI: <a href="http://www.ncbi.nlm.nih.gov/">http://www.ncbi.nlm.nih.gov/</a>                                                             |                                                   |
| Echinodermata | <i>Strongylocentrotus purpuratus</i> | <a href="http://www.spbase.org/SpBase/">http://www.spbase.org/SpBase/</a>                                                                 | (Cameron et al. 2009)                             |
| Chordata      | <i>Ciona intestinalis</i>            | <a href="http://genome.jgi-psf.org/Cioin2/Cioin2.home.html">http://genome.jgi-psf.org/Cioin2/Cioin2.home.html</a>                         | (Dehal et al. 2002)                               |
|               | <i>Branchiostoma floridae</i>        | <a href="http://genome.jgi-psf.org/Brafl1/Brafl1.home.html">http://genome.jgi-psf.org/Brafl1/Brafl1.home.html</a>                         | (Putnam et al. 2008)                              |
|               | <i>Xenopus laevis</i>                | NCBI: <a href="http://www.ncbi.nlm.nih.gov/">http://www.ncbi.nlm.nih.gov/</a>                                                             | (Klein et al. 2002)                               |
|               | <i>Danio rerio</i>                   | NCBI: <a href="http://www.ncbi.nlm.nih.gov/">http://www.ncbi.nlm.nih.gov/</a>                                                             |                                                   |
|               | <i>Mus musculus</i>                  | NCBI: <a href="http://www.ncbi.nlm.nih.gov/">http://www.ncbi.nlm.nih.gov/</a>                                                             |                                                   |
|               | <i>Homo sapiens</i>                  | NCBI: <a href="http://www.ncbi.nlm.nih.gov/">http://www.ncbi.nlm.nih.gov/</a>                                                             |                                                   |

| Consensus               | 1          | 10      | 20  | 30  | 40  | 50  | 60  | 70  |
|-------------------------|------------|---------|-----|-----|-----|-----|-----|-----|
| Identity                | VVLV       | ---     | --- | --- | --- | --- | --- | --- |
| 1. O.carmela_1          | VVLV       | ---     | --- | --- | --- | --- | --- | --- |
| 2. S.domuncula          | VVLV       | ---     | --- | --- | --- | --- | --- | --- |
| 3. M.leidy              | VVLV       | ---     | --- | --- | --- | --- | --- | --- |
| 4. A.queenslandica      | VVLV       | ---     | --- | --- | --- | --- | --- | --- |
| 5. F.scutaria_2         | VVLV       | ---     | --- | --- | --- | --- | --- | --- |
| 6. A.millepora_1        | VVLV       | ---     | --- | --- | --- | --- | --- | --- |
| 7. N.vectensis_1        | VVLV       | ---     | --- | --- | --- | --- | --- | --- |
| 8. A.pallida_1          | VVLV       | ---     | --- | --- | --- | --- | --- | --- |
| 9. A.pallida_3          | VVLV       | ---     | --- | --- | --- | --- | --- | --- |
| 10. N.vectensis_2       | VVLV       | ---     | --- | --- | --- | --- | --- | --- |
| 11. F.scutaria          | VVLV       | ---     | --- | --- | --- | --- | --- | --- |
| 12. A.digitifera        | VVLV       | ---     | --- | --- | --- | --- | --- | --- |
| 13. A.millepora_2       | VVLV       | ---     | --- | --- | --- | --- | --- | --- |
| 14. N.vectensis_3       | VVLV       | ---     | --- | --- | --- | --- | --- | --- |
| 15. A.pallida_2         | VVLV       | ---     | --- | --- | --- | --- | --- | --- |
| 16. A.elegantissima     | VVLV       | ---     | --- | --- | --- | --- | --- | --- |
| 17. T.adherans          | VVLV       | ---     | --- | --- | --- | --- | --- | --- |
| 18. C.intestinalis_1    | VVLV       | ---     | --- | --- | --- | --- | --- | --- |
| 19. D.rrerio_LMP2       | VVLV       | ---     | --- | --- | --- | --- | --- | --- |
| 20. X.laevius           | VVLV       | ---     | --- | --- | --- | --- | --- | --- |
| 21. M.musculus_LMP2     | VVLV       | ---     | --- | --- | --- | --- | --- | --- |
| 22. H.sapiens_LMP2      | VVLV       | ---     | --- | --- | --- | --- | --- | --- |
| 23. S.purpuratus_2      | VVLV       | ---     | --- | --- | --- | --- | --- | --- |
| 24. B.floridae          | VVLV       | ---     | --- | --- | --- | --- | --- | --- |
| 25. C.intestinalis_2    | VVLV       | ---     | --- | --- | --- | --- | --- | --- |
| 26. D.rrerio_CD36       | VVLV       | ---     | --- | --- | --- | --- | --- | --- |
| 27. M.musculus_CD36     | VVLV       | ---     | --- | --- | --- | --- | --- | --- |
| 28. H.sapiens_CD36      | VVLV       | ---     | --- | --- | --- | --- | --- | --- |
| 29. C.elegans           | VVLV       | ---     | --- | --- | --- | --- | --- | --- |
| 30. D.melanogaster_pste | VVLV       | ---     | --- | --- | --- | --- | --- | --- |
| 31. D.melanogaster_croq | VVLV       | ---     | --- | --- | --- | --- | --- | --- |
| 32. S.purpuratus_1      | VVLV       | ---     | --- | --- | --- | --- | --- | --- |
| 33. D.melanogaster_EMP  | VVLV       | ---     | --- | --- | --- | --- | --- | --- |
| 34. D.rrerio_SRB1       | VVLV       | ---     | --- | --- | --- | --- | --- | --- |
| 35. M.musculus_SRB1     | VVLV       | ---     | --- | --- | --- | --- | --- | --- |
| 36. H.sapiens_SRB1      | VVLV       | ---     | --- | --- | --- | --- | --- | --- |
| Consensus               | NITFN-DNGA | ---     | --- | --- | --- | --- | --- | --- |
| Identity                | NITFN      | DNGA    | --- | --- | --- | --- | --- | --- |
| 1. O.carmela_1          | DPOQV      | ENDDI   | --- | --- | --- | --- | --- | --- |
| 2. S.domuncula          | DPOQV      | ENDDI   | --- | --- | --- | --- | --- | --- |
| 3. M.leidy              | DPOQV      | ENDDI   | --- | --- | --- | --- | --- | --- |
| 4. A.queenslandica      | DPOQV      | ENDDI   | --- | --- | --- | --- | --- | --- |
| 5. F.scutaria_2         | DPOQV      | ENDDI   | --- | --- | --- | --- | --- | --- |
| 6. A.millepora_1        | DPOQV      | ENDDI   | --- | --- | --- | --- | --- | --- |
| 7. N.vectensis_1        | DPOQV      | ENDDI   | --- | --- | --- | --- | --- | --- |
| 8. A.pallida_1          | DPOQV      | ENDDI   | --- | --- | --- | --- | --- | --- |
| 9. A.pallida_3          | DPOQV      | ENDDI   | --- | --- | --- | --- | --- | --- |
| 10. N.vectensis_2       | DPOQV      | ENDDI   | --- | --- | --- | --- | --- | --- |
| 11. F.scutaria          | DPOQV      | ENDDI   | --- | --- | --- | --- | --- | --- |
| 12. A.digitifera        | DPOQV      | ENDDI   | --- | --- | --- | --- | --- | --- |
| 13. A.millepora_2       | DPOQV      | ENDDI   | --- | --- | --- | --- | --- | --- |
| 14. N.vectensis_3       | DPOQV      | ENDDI   | --- | --- | --- | --- | --- | --- |
| 15. A.pallida_2         | DPOQV      | ENDDI   | --- | --- | --- | --- | --- | --- |
| 16. A.elegantissima     | DPOQV      | ENDDI   | --- | --- | --- | --- | --- | --- |
| 17. T.adherans          | DPOQV      | ENDDI   | --- | --- | --- | --- | --- | --- |
| 18. C.intestinalis_1    | DPOQV      | ENDDI   | --- | --- | --- | --- | --- | --- |
| 19. D.rrerio_LMP2       | DPOQV      | ENDDI   | --- | --- | --- | --- | --- | --- |
| 20. X.laevius           | DPOQV      | ENDDI   | --- | --- | --- | --- | --- | --- |
| 21. M.musculus_LMP2     | DPOQV      | ENDDI   | --- | --- | --- | --- | --- | --- |
| 22. H.sapiens_LMP2      | DPOQV      | ENDDI   | --- | --- | --- | --- | --- | --- |
| 23. S.purpuratus_2      | DPOQV      | ENDDI   | --- | --- | --- | --- | --- | --- |
| 24. B.floridae          | DPOQV      | ENDDI   | --- | --- | --- | --- | --- | --- |
| 25. C.intestinalis_2    | DPOQV      | ENDDI   | --- | --- | --- | --- | --- | --- |
| 26. D.rrerio_CD36       | DPOQV      | ENDDI   | --- | --- | --- | --- | --- | --- |
| 27. M.musculus_CD36     | DPOQV      | ENDDI   | --- | --- | --- | --- | --- | --- |
| 28. H.sapiens_CD36      | DPOQV      | ENDDI   | --- | --- | --- | --- | --- | --- |
| 29. C.elegans           | DPOQV      | ENDDI   | --- | --- | --- | --- | --- | --- |
| 30. D.melanogaster_pste | DPOQV      | ENDDI   | --- | --- | --- | --- | --- | --- |
| 31. D.melanogaster_croq | DPOQV      | ENDDI   | --- | --- | --- | --- | --- | --- |
| 32. S.purpuratus_1      | DPOQV      | ENDDI   | --- | --- | --- | --- | --- | --- |
| 33. D.melanogaster_EMP  | DPOQV      | ENDDI   | --- | --- | --- | --- | --- | --- |
| 34. D.rrerio_SRB1       | DPOQV      | ENDDI   | --- | --- | --- | --- | --- | --- |
| 35. M.musculus_SRB1     | DPOQV      | ENDDI   | --- | --- | --- | --- | --- | --- |
| 36. H.sapiens_SRB1      | DPOQV      | ENDDI   | --- | --- | --- | --- | --- | --- |
| Consensus               | ---        | DFV     | --- | --- | --- | --- | --- | --- |
| Identity                | ---        | DFV     | --- | --- | --- | --- | --- | --- |
| 1. O.carmela_1          | ---        | IRKDFRA | --- | --- | --- | --- | --- | --- |
| 2. S.domuncula          | ---        | IRKDFRA | --- | --- | --- | --- | --- | --- |
| 3. M.leidy              | ---        | IRKDFRA | --- | --- | --- | --- | --- | --- |
| 4. A.queenslandica      | ---        | IRKDFRA | --- | --- | --- | --- | --- | --- |
| 5. F.scutaria_2         | ---        | IRKDFRA | --- | --- | --- | --- | --- | --- |
| 6. A.millepora_1        | ---        | IRKDFRA | --- | --- | --- | --- | --- | --- |
| 7. N.vectensis_1        | ---        | IRKDFRA | --- | --- | --- | --- | --- | --- |
| 8. A.pallida_1          | ---        | IRKDFRA | --- | --- | --- | --- | --- | --- |
| 9. A.pallida_3          | ---        | IRKDFRA | --- | --- | --- | --- | --- | --- |
| 10. N.vectensis_2       | ---        | IRKDFRA | --- | --- | --- | --- | --- | --- |
| 11. F.scutaria          | ---        | IRKDFRA | --- | --- | --- | --- | --- | --- |
| 12. A.digitifera        | ---        | IRKDFRA | --- | --- | --- | --- | --- | --- |
| 13. A.millepora_2       | ---        | IRKDFRA | --- | --- | --- | --- | --- | --- |
| 14. N.vectensis_3       | ---        | IRKDFRA | --- | --- | --- | --- | --- | --- |
| 15. A.pallida_2         | ---        | IRKDFRA | --- | --- | --- | --- | --- | --- |
| 16. A.elegantissima     | ---        | IRKDFRA | --- | --- | --- | --- | --- | --- |
| 17. T.adherans          | ---        | IRKDFRA | --- | --- | --- | --- | --- | --- |
| 18. C.intestinalis_1    | ---        | IRKDFRA | --- | --- | --- | --- | --- | --- |
| 19. D.rrerio_LMP2       | ---        | IRKDFRA | --- | --- | --- | --- | --- | --- |
| 20. X.laevius           | ---        | IRKDFRA | --- | --- | --- | --- | --- | --- |
| 21. M.musculus_LMP2     | ---        | IRKDFRA | --- | --- | --- | --- | --- | --- |
| 22. H.sapiens_LMP2      | ---        | IRKDFRA | --- | --- | --- | --- | --- | --- |
| 23. S.purpuratus_2      | ---        | IRKDFRA | --- | --- | --- | --- | --- | --- |
| 24. B.floridae          | ---        | IRKDFRA | --- | --- | --- | --- | --- | --- |
| 25. C.intestinalis_2    | ---        | IRKDFRA | --- | --- | --- | --- | --- | --- |
| 26. D.rrerio_CD36       | ---        | IRKDFRA | --- | --- | --- | --- | --- | --- |
| 27. M.musculus_CD36     | ---        | IRKDFRA | --- | --- | --- | --- | --- | --- |
| 28. H.sapiens_CD36      | ---        | IRKDFRA | --- | --- | --- | --- | --- | --- |
| 29. C.elegans           | ---        | IRKDFRA | --- | --- | --- | --- | --- | --- |
| 30. D.melanogaster_pste | ---        | IRKDFRA | --- | --- | --- | --- | --- | --- |
| 31. D.melanogaster_croq | ---        | IRKDFRA | --- | --- | --- | --- | --- | --- |
| 32. S.purpuratus_1      | ---        | IRKDFRA | --- | --- | --- | --- | --- | --- |
| 33. D.melanogaster_EMP  | ---        | IRKDFRA | --- | --- | --- | --- | --- | --- |
| 34. D.rrerio_SRB1       | ---        | IRKDFRA | --- | --- | --- | --- | --- | --- |
| 35. M.musculus_SRB1     | ---        | IRKDFRA | --- | --- | --- | --- | --- | --- |
| 36. H.sapiens_SRB1      | ---        | IRKDFRA | --- | --- | --- | --- | --- | --- |
| Consensus               | ---        | ---     | --- | --- | --- | --- | --- | --- |
| Identity                | ---        | ---     | --- | --- | --- | --- | --- | --- |
| 1. O.carmela_1          | ---        | SLQVNS  | --- | --- | --- | --- | --- | --- |
| 2. S.domuncula          | ---        | SLQVNS  | --- | --- | --- | --- | --- | --- |
| 3. M.leidy              | ---        | SLQVNS  | --- | --- | --- | --- | --- | --- |
| 4. A.queenslandica      | ---        | SLQVNS  | --- | --- | --- | --- | --- | --- |
| 5. F.scutaria_2         | ---        | SLQVNS  | --- | --- | --- | --- | --- | --- |
| 6. A.millepora_1        | ---        | SLQVNS  | --- | --- | --- | --- | --- | --- |
| 7. N.vectensis_1        | ---        | SLQVNS  | --- | --- | --- | --- | --- | --- |
| 8. A.pallida_1          | ---        | SLQVNS  | --- | --- | --- | --- | --- | --- |
| 9. A.pallida_3          | ---        | SLQVNS  | --- | --- | --- | --- | --- | --- |
| 10. N.vectensis_2       | ---        | SLQVNS  | --- | --- | --- | --- | --- | --- |
| 11. F.scutaria          | ---        | SLQVNS  | --- | --- | --- | --- | --- | --- |
| 12. A.digitifera        | ---        | SLQVNS  | --- | --- | --- | --- | --- | --- |
| 13. A.millepora_2       | ---        | SLQVNS  | --- | --- | --- | --- | --- | --- |
| 14. N.vectensis_3       | ---        | SLQVNS  | --- | --- | --- | --- | --- | --- |
| 15. A.pallida_2         | ---        | SLQVNS  | --- | --- | --- | --- | --- | --- |
| 16. A.elegantissima     | ---        | SLQVNS  | --- | --- | --- | --- | --- | --- |
| 17. T.adherans          | ---        | SLQVNS  | --- | --- | --- | --- | --- | --- |
| 18. C.intestinalis_1    | ---        | SLQVNS  | --- | --- | --- | --- | --- | --- |
| 19. D.rrerio_LMP2       | ---        | SLQVNS  | --- | --- | --- | --- | --- | --- |
| 20. X.laevius           | ---        | SLQVNS  | --- | --- | --- | --- | --- | --- |
| 21. M.musculus_LMP2     | ---        | SLQVNS  | --- | --- | --- | --- | --- | --- |
| 22. H.sapiens_LMP2      | ---        | SLQVNS  | --- | --- | --- | --- | --- | --- |
| 23. S.purpuratus_2      | ---        | SLQVNS  | --- | --- | --- | --- | --- | --- |
| 24. B.floridae          | ---        | SLQVNS  | --- | --- | --- | --- | --- | --- |
| 25. C.intestinalis_2    | ---        | SLQVNS  | --- | --- | --- | --- | --- | --- |
| 26. D.rrerio_CD36       | ---        | SLQVNS  | --- | --- | --- | --- | --- | --- |
| 27. M.musculus_CD36     | ---        | SLQVNS  | --- | --- | --- | --- | --- | --- |
| 28. H.sapiens_CD36      | ---        | SLQVNS  | --- | --- | --- | --- | --- | --- |
| 29. C.elegans           | ---        | SLQVNS  | --- | --- | --- | --- | --- | --- |
| 30. D.melanogaster_pste | ---        | SLQVNS  | --- | --- | --- | --- | --- | --- |
| 31. D.melanogaster_croq | ---        | SLQVNS  | --- | --- | --- | --- | --- | --- |
| 32. S.purpuratus_1      | ---        | SLQVNS  | --- | --- | --- | --- | --- | --- |
| 33. D.melanogaster_EMP  | ---        | SLQVNS  | --- | --- | --- | --- | --- | --- |
| 34. D.rrerio_SRB1       | ---        | SLQVNS  | --- | --- | --- | --- | --- | --- |
| 35. M.musculus_SRB1     | ---        | SLQVNS  | --- | --- | --- | --- | --- | --- |
| 36. H.sapiens_SRB1      | ---        | SLQVNS  | --- | --- | --- | --- | --- | --- |
| Consensus               | ---        | ---     | --- | --- | --- | --- | --- | --- |
| Identity                | ---        | ---     | --- | --- | --- | --- | --- | --- |
| 1. O.carmela_1          | ---        | FIDDL   | --- | --- | --- | --- | --- | --- |
| 2. S.domuncula          | ---        | FIDDL   | --- | --- | --- | --- | --- | --- |
| 3. M.leidy              | ---        | FIDDL   | --- | --- | --- | --- | --- | --- |
| 4. A.queenslandica      | ---        | FIDDL   | --- | --- | --- | --- | --- | --- |
| 5. F.scutaria_2         | ---        | FIDDL   | --- | --- | --- | --- | --- | --- |
| 6. A.millepora_1        | ---        | FIDDL   | --- | --- | --- | --- | --- | --- |
| 7. N.vectensis_1        | ---        | FIDDL   | --- | --- | --- | --- | --- | --- |
| 8. A.pallida_1          | ---        | FIDDL   | --- | --- | --- | --- | --- | --- |
| 9. A.pallida_3          | ---        | FIDDL   | --- | --- | --- | --- | --- | --- |
| 10. N.vectensis_2       | ---        | FIDDL   | --- | --- | --- | --- | --- | --- |
| 11. F.scutaria          | ---        | FIDDL   | --- | --- | --- | --- | --- | --- |
| 12. A.digitifera        | ---        | FIDDL   | --- | --- | --- | --- | --- | --- |
| 13. A.millepora_2       | ---        | FIDDL   | --- | --- | --- | --- | --- | --- |
| 14. N.vectensis_3       | ---        | FIDDL   | --- | --- | --- | --- | --- | --- |
| 15. A.pallida_2         | ---        | FIDDL   | --- | --- | --- | --- | --- | --- |
| 16. A                   |            |         |     |     |     |     |     |     |

**Figure S1.** Multiple sequence alignment of the CD36 domain from SR-B homologues of cnidarians and select other metazoans. Cnidarian proteins lack one of the three pairs of cysteine residues known to form three disulphide bridges in the human CD36 protein. All six cnidarian species have a pair of cysteine residues at positions C107 and C117.

## References

- Baumgarten S, Simakov O, Esherick LY, Liew YJ, Lehnert EM, Michell CT, Li Y, Hambleton EA, Guse A, Oates ME, Gough J, Weis VM, Aranda M, Pringle JR, and Voolstra CR. 2015. The genome of *Aiptasia*, a sea anemone model for coral symbiosis. *Proceedings of the National Academy of Sciences* 112:11893-11898. DOI: 10.1073/pnas.1513318112
- Cameron RA, Samanta M, Yuan A, He D, and Davidson E. 2009. SpBase: the sea urchin genome database and web site. *Nucleic Acids Research* 37:D750-D754. DOI: 10.1093/nar/gkn887
- Dehal P, Satou Y, Campbell RK, Chapman J, Degnan B, De Tomaso A, Davidson B, Di Gregorio A, Gelpke M, and Goodstein DM. 2002. The draft genome of *Ciona intestinalis*: insights into chordate and vertebrate origins. *Science* 298:2157-2167. DOI: 10.1126/science.1080049
- Harcet M, Roller M, Četković H, Perina D, Wiens M, Müller WEG, and Vlahoviček K. 2010. Demosponge EST sequencing reveals a complex genetic toolkit of the simplest metazoans. *Molecular Biology and Evolution* 27:2747-2756. DOI: 10.1093/molbev/msq174
- Kitchen SA, Crowder CM, Poole AZ, Weis VM, and Meyer E. 2015. *De novo* assembly and characterization of four anthozoan (Phylum Cnidaria) transcriptomes. *G3: Genes/Genomes/Genetics* 5:2441-2452. DOI: 10.1534/g3.115.020164
- Klein SL, Strausberg RL, Wagner L, Pontius J, Clifton SW, and Richardson P. 2002. Genetic and genomic tools for *Xenopus* research: The NIH *Xenopus* initiative. *Developmental Dynamics* 225:384-391. DOI: 10.1002/dvdy.10174
- Lehnert E, Burriesci M, and Pringle J. 2012. Developing the anemone *Aiptasia* as a tractable model for cnidarian-dinoflagellate symbiosis: the transcriptome of aposymbiotic *A. pallida*. *BMC Genomics* 13:271. DOI: 10.1186/1471-2164-13-271
- Moya A, Huisman L, Ball E, Hayward D, Grasso L, Chua C, Woo H, GATTUSO JP, Forêt S, and Miller D. 2012. Whole transcriptome analysis of the coral *Acropora millepora* reveals complex responses to CO<sub>2</sub>-driven acidification during the initiation of calcification. *Molecular Ecology* 21:2440-2454. DOI: 10.1111/j.1365-294X.2012.05554.x
- Nichols SA, Roberts BW, Richter DJ, Fairclough SR, and King N. 2012. Origin of metazoan cadherin diversity and the antiquity of the classical cadherin/β-catenin complex. *Proceedings of the National Academy of Sciences* 109:13046-13051. DOI: 10.1073/pnas.1120685109
- Putnam NH, Butts T, Ferrier DE, Furlong RF, Hellsten U, Kawashima T, Robinson-Rechavi M, Shoguchi E, Terry A, and Yu J-K. 2008. The amphioxus genome and the evolution of the chordate karyotype. *Nature* 453:1064-1071. DOI: 10.1038/nature06967
- Putnam NH, Srivastava M, Hellsten U, Dirks B, Chapman J, Salamov A, Terry A, Shapiro H, Lindquist E, Kapitonov VV, Jurka J, Genikhovich G, Grigoriev IV, Lucas SM, Steele RE, Finnerty JR, Technau U, Martindale MQ, and Rokhsar DS. 2007. Sea anemone genome reveals ancestral eumetazoan gene repertoire and genomic organization. *Science* 317:86-94. DOI: 10.1126/science.1139158
- Ryan JF, Pang K, Schnitzler CE, Nguyen A-D, Moreland RT, Simmons DK, Koch BJ, Francis WR, Havlak P, and Smith SA. 2013. The genome of the ctenophore *Mnemiopsis leidyi*

and its implications for cell type evolution. *Science* 342:1242592. DOI: 10.1126/science.1242592

- Shinzato C, Shoguchi E, Kawashima T, Hamada M, Hisata K, Tanaka M, Fujie M, Fujiwara M, Koyanagi R, Ikuta T, Fujiyama A, Miller DJ, and Satoh N. 2011. Using the *Acropora digitifera* genome to understand coral responses to environmental change. *Nature* 476:320-323. DOI: 10.1038/nature10249
- Srivastava M, Begovic E, Chapman J, Putnam NH, Hellsten U, Kawashima T, Kuo A, Mitros T, Salamov A, and Carpenter ML. 2008. The *Trichoplax* genome and the nature of placozoans. *Nature* 454:955-960. DOI: 10.1038/nature07191
- Srivastava M, Simakov O, Chapman J, Fahey B, Gauthier ME, Mitros T, Richards GS, Conaco C, Dacre M, and Hellsten U. 2010. The *Amphimedon queenslandica* genome and the evolution of animal complexity. *Nature* 466:720-726. DOI: 10.1038/nature09201
- Stein L, Sternberg P, Durbin R, Thierry-Mieg J, and Spieth J. 2001. WormBase: network access to the genome and biology of *Caenorhabditis elegans*. *Nucleic Acids Research* 29:82-86. DOI: 10.1093/nar/29.1.82
